# Supplementary material for: The Anti-Proliferative Activity of the Hybrid TMS-TMF-4f Compound Against Human Cervical Cancer Involves Apoptosis Mediated by STAT3 Inactivation
Source: PubMed Central journal article supplement (PMC6966466; doi:10.3390/cancers11121927), 2019-12-03
Supplement: cancers-11-01927-s001.pdf [file cancers-11-01927-s001.pdf]

Figure 1c - HeLa

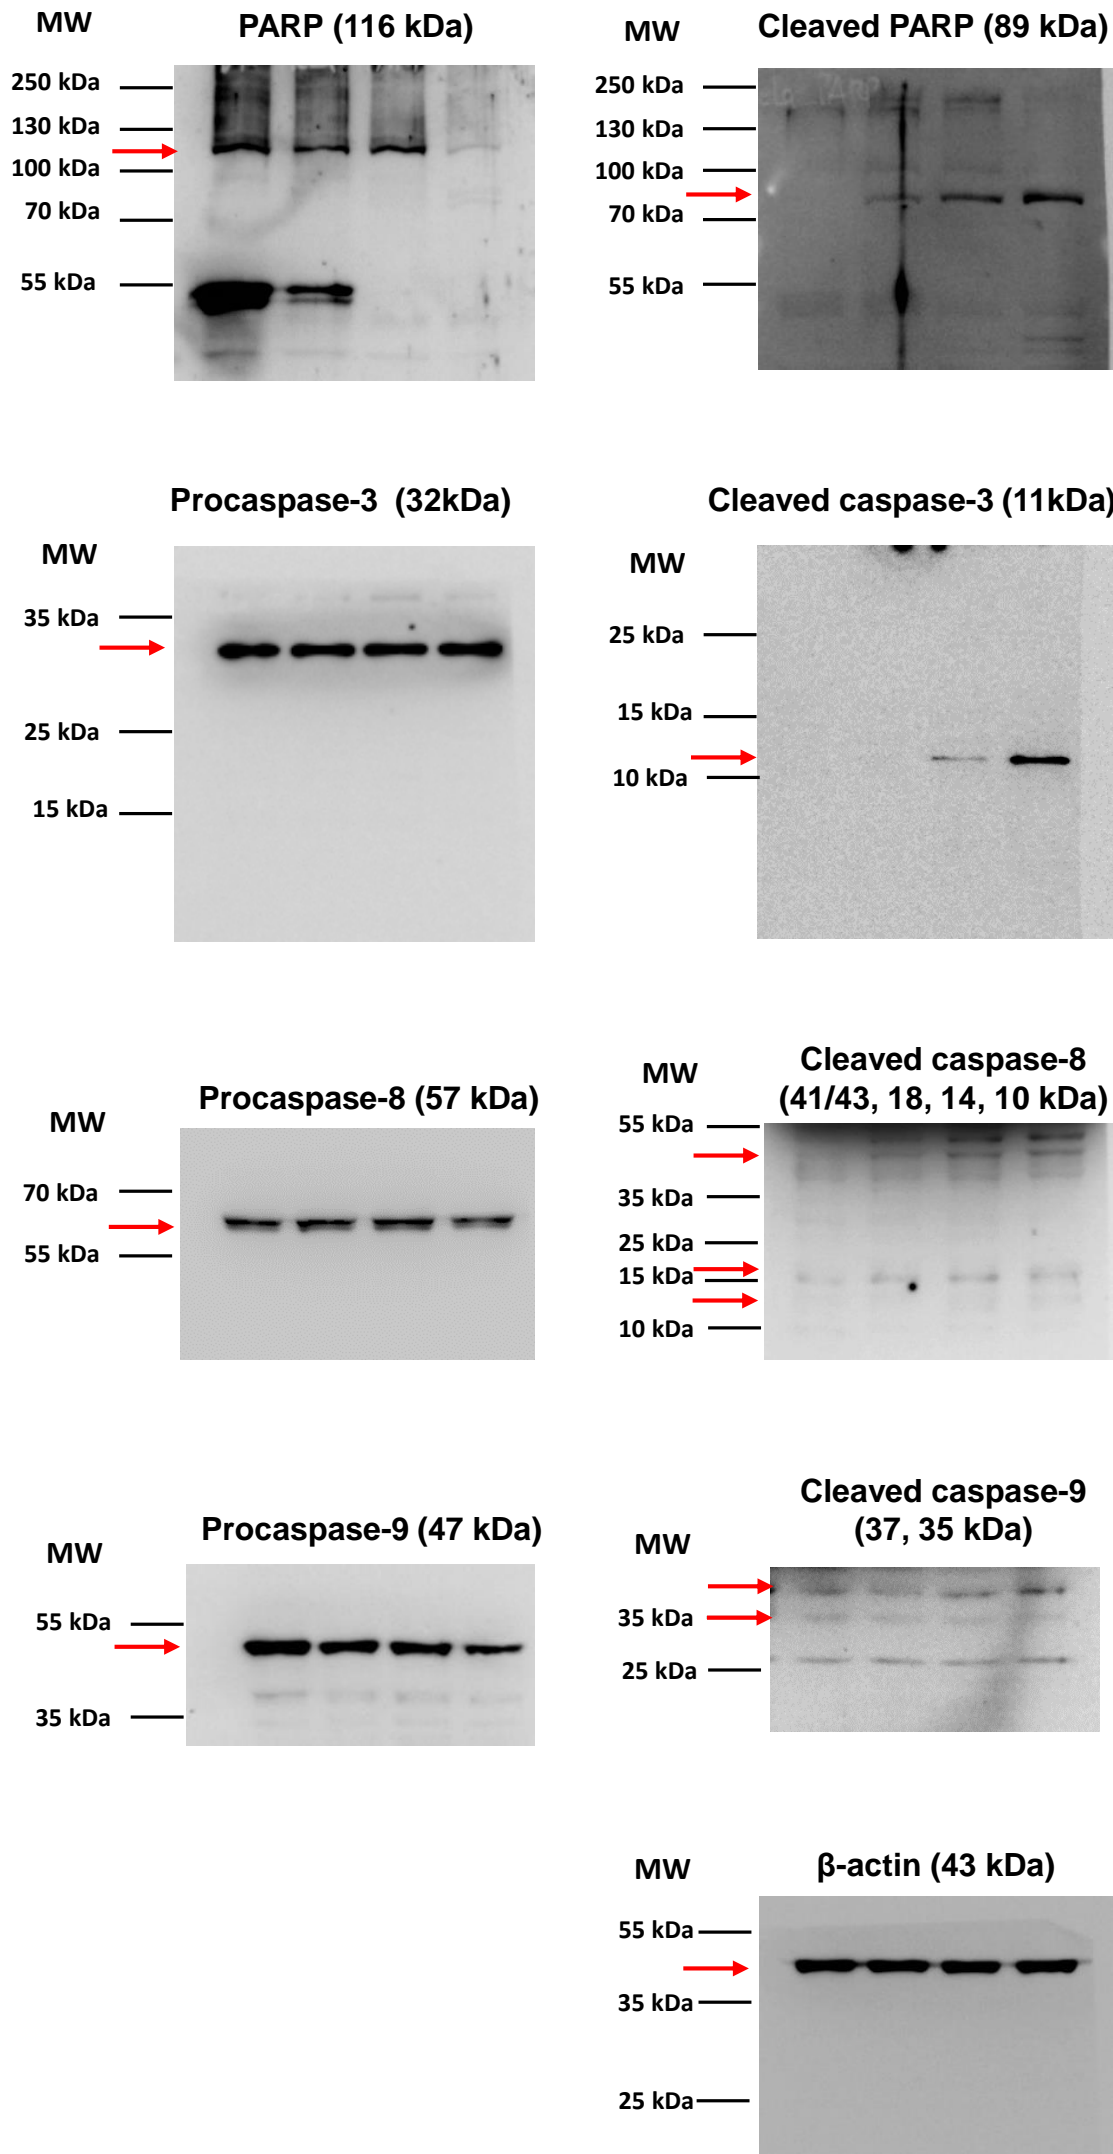

Fig.1.c-HeLa

Gel name : TMS-TMF-4f\_HeLa c PARP.tif (Raw 1-D Image)

| Index | Name | Volume   | Adj. Vol. | % Adj. Vo | Concentration |                    |          |
|-------|------|----------|-----------|-----------|---------------|--------------------|----------|
|       |      | INT*mm2  | INT*mm2   |           |               |                    |          |
|       | (uM) |          |           |           |               | cleaved PARP/actin | Ratio    |
| 1     | 0    | 1246.507 | 1246.507  | 14.03441  | N/A           | 0.213786754        | 0.456834 |
| 2     | 2.5  | 1604.642 | 1604.642  | 18.06665  | N/A           | 0.272860504        | 0.583067 |
| 3     | 5    | 2847.794 | 2847.794  | 32.06329  | N/A           | 0.421141266        | 0.899924 |
| 4     | 10   | 3182.847 | 3182.847  | 35.83565  | N/A           | 0.467974328        | 1        |

Gel name : TMS-TMF-4f\_HeLa cleaved cas3 (Raw 1-D Image)

| Index | Name | Volume   | Adj. Vol. | % Adj. Vo | Concentration |                    |          |
|-------|------|----------|-----------|-----------|---------------|--------------------|----------|
|       |      | INT*mm2  | INT*mm2   |           |               |                    |          |
|       | (uM) |          |           |           |               | cleaved cas3/actin | Ratio    |
| 1     | 0    | 379.3541 | 379.3541  | 7.10164   | N/A           | 0.058967669        | 0.107687 |
| 2     | 2.5  | 382.9957 | 382.9957  | 7.169811  | N/A           | 0.059128618        | 0.107981 |
| 3     | 5    | 1060.844 | 1060.844  | 19.85936  | N/A           | 0.16578371         | 0.302756 |
| 4     | 10   | 3518.588 | 3518.588  | 65.86919  | N/A           | 0.547581716        | 1        |

Gel name : TMS-TMF-4f\_HeLa cleaved cas8 (Raw 1-D Image)

| Index | Name | Volume   | Adj. Vol. | % Adj. Vo | Concentration |                    |          |
|-------|------|----------|-----------|-----------|---------------|--------------------|----------|
|       |      | INT*mm2  | INT*mm2   |           |               |                    |          |
|       | (uM) |          |           |           |               | cleaved cas8/actin | Ratio    |
| 1     | 0    | 270.9099 | 270.9099  | 13.74195  | N/A           | 0.043107279        | 0.477313 |
| 2     | 2.5  | 536.5724 | 536.5724  | 27.21772  | N/A           | 0.085832891        | 0.950399 |
| 3     | 5    | 599.196  | 599.196   | 30.39431  | N/A           | 0.099306909        | 1.099593 |
| 4     | 10   | 564.7301 | 564.7301  | 28.64602  | N/A           | 0.090312459        | 1        |

Gel name : TMS-TMF-4f\_HeLa cleaved cas9 (Raw 1-D Image)

| Index | Name | Volume   | Adj. Vol. | % Adj. Vo | Concentration |                    |          |
|-------|------|----------|-----------|-----------|---------------|--------------------|----------|
|       |      | INT*mm2  | INT*mm2   |           |               |                    |          |
|       | (uM) |          |           |           |               | cleaved cas9/actin | Ratio    |
| 1     | 0    | 230.7548 | 240.7451  | 20.34802  | N/A           | 0.036186789        | 0.533931 |
| 2     | 2.5  | 230.0784 | 230.0784  | 19.44646  | N/A           | 0.034813022        | 0.513662 |
| 3     | 5    | 274.2647 | 274.2647  | 23.18114  | N/A           | 0.040418945        | 0.596376 |
| 4     | 10   | 438.0493 | 438.0493  | 37.02438  | N/A           | 0.067774229        | 1        |

Gel name : TMS-TMF-4f\_HeLa bactin (Raw 1-D Image)

| Index | Name | Volume   | Adj. Vol. | % Adj. Vo | Concentration |  |  |
|-------|------|----------|-----------|-----------|---------------|--|--|
|       |      | INT*mm2  | INT*mm2   |           |               |  |  |
|       | (uM) |          |           |           |               |  |  |
| 1     | 0    | 6984.904 | 6984.904  | 25.27511  | N/A           |  |  |
| 2     | 2.5  | 6999.212 | 6999.212  | 25.32689  | N/A           |  |  |
| 3     | 5    | 6832.732 | 6832.732  | 24.72447  | N/A           |  |  |
| 4     | 10   | 6818.653 | 6818.653  | 24.67353  | N/A           |  |  |

**Figure 1c - CaSki**

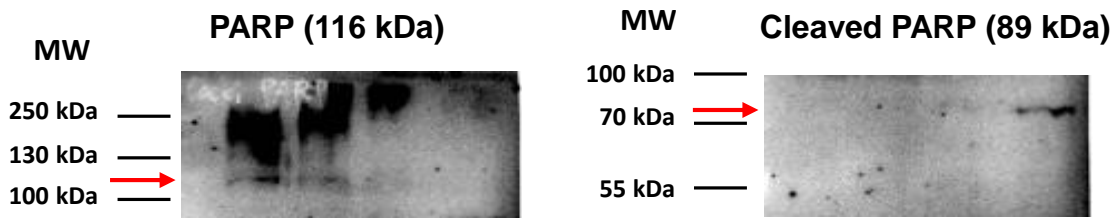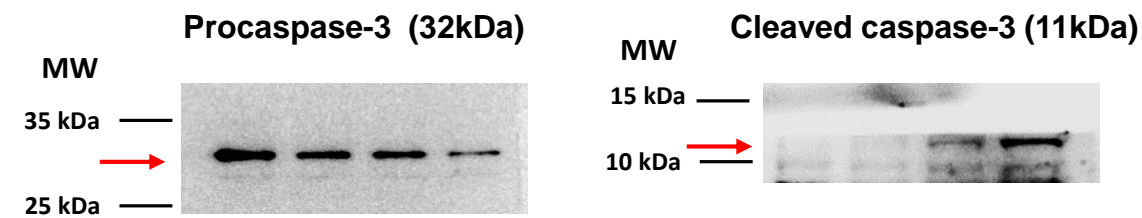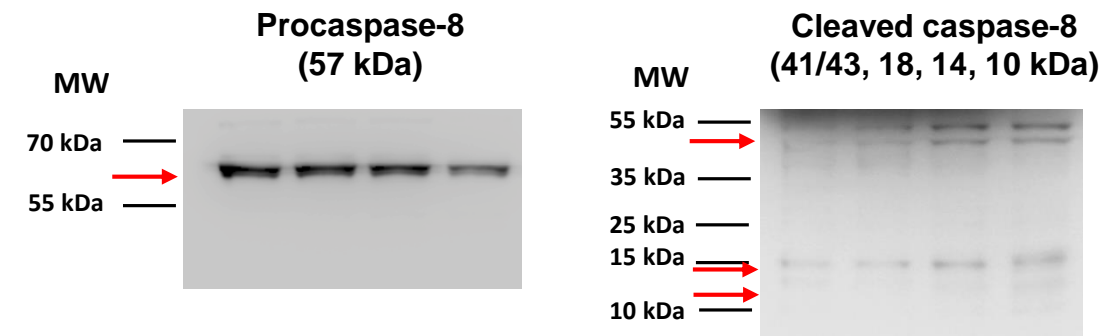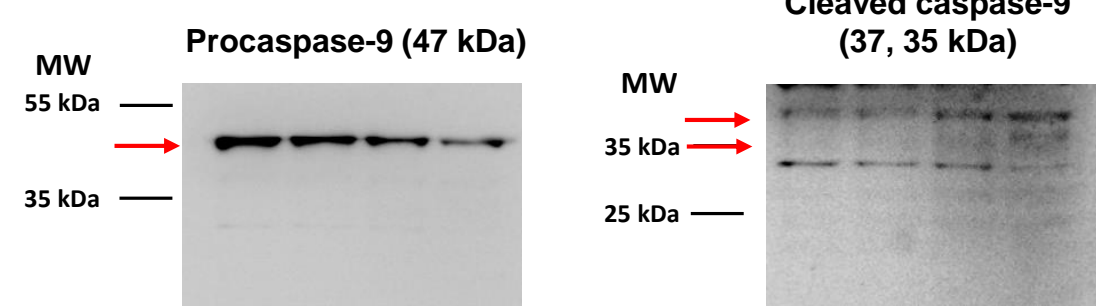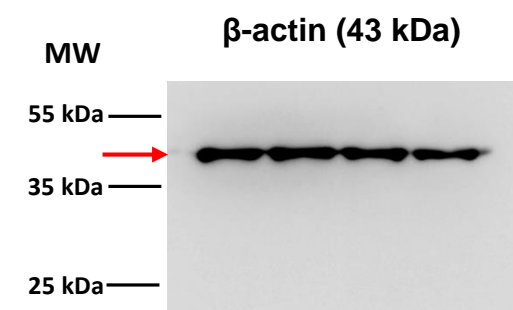

**Fig.1.c-CaSki**

Gel name : TMS-TMF-4f\_Caski c PARP.tif (Raw 1-D Image)

| Index | Name | Volume   | Adj. Vol. | % Adj. Vo | Concentration |                    |          |
|-------|------|----------|-----------|-----------|---------------|--------------------|----------|
|       |      | INT*mm2  | INT*mm2   |           |               |                    |          |
|       | (uM) |          |           |           |               | cleaved PARP/actin | Ratio    |
| 1     | 0    | 2094.505 | 2094.505  | 19.74003  | N/A           | 0.355073229        | 0.534769 |
| 2     | 2.5  | 2761.772 | 2761.772  | 26.02881  | N/A           | 0.453268845        | 0.68266  |
| 3     | 5    | 2245.128 | 2245.128  | 21.1596   | N/A           | 0.396543814        | 0.597227 |
| 4     | 10   | 3509.04  | 3509.04   | 33.07156  | N/A           | 0.663974665        | 1        |

Gel name : TMS-TMF-4f\_caski cleaved cas3 v2 (Raw 1-D Image)

| Index | Name | Volume   | Adj. Vol. | % Adj. Vo | Concentration |                    |          |
|-------|------|----------|-----------|-----------|---------------|--------------------|----------|
|       |      | INT*mm2  | INT*mm2   |           |               |                    |          |
|       | (uM) |          |           |           |               | cleaved cas3/actin | Ratio    |
| 1     | 0    | 3345.054 | 3345.054  | 17.49902  | N/A           | 0.540425606        | 0.46407  |
| 2     | 2.5  | 3804.58  | 3804.58   | 19.90295  | N/A           | 0.617250495        | 0.530041 |
| 3     | 5    | 5686.641 | 5686.641  | 29.7486   | N/A           | 0.980044659        | 0.841576 |
| 4     | 10   | 6279.386 | 6279.386  | 32.84943  | N/A           | 1.164534456        | 1        |

Gel name : TMS-TMF-4f\_caski cleaved cas8 (Raw 1-D Image)

| Index | Name | Volume   | Adj. Vol. | % Adj. Vo | Concentration |                    |          |
|-------|------|----------|-----------|-----------|---------------|--------------------|----------|
|       |      | INT*mm2  | INT*mm2   |           |               |                    |          |
|       | (uM) |          |           |           |               | cleaved cas8/actin | Ratio    |
| 1     | 0    | 163.3258 | 163.3258  | 19.48283  | N/A           | 0.028093089        | 0.511451 |
| 2     | 2.5  | 199.6842 | 199.6842  | 23.81995  | N/A           | 0.034909359        | 0.635545 |
| 3     | 5    | 239.2827 | 239.2827  | 28.54358  | N/A           | 0.044403525        | 0.808392 |
| 4     | 10   | 236.0139 | 236.0139  | 28.15365  | N/A           | 0.054928196        | 1        |

Gel name : TMS-TMF-4f\_caski cleaved cas9 (Raw 1-D Image)

| Index | Name | Volume   | Adj. Vol. | % Adj. Vo | Concentration |                    |          |
|-------|------|----------|-----------|-----------|---------------|--------------------|----------|
|       |      | INT*mm2  | INT*mm2   |           |               |                    |          |
|       | (uM) |          |           |           |               | cleaved cas9/actin | Ratio    |
| 1     | 0    | 906.1488 | 906.1488  | 17.87605  | N/A           | 0.162578924        | 0.474579 |
| 2     | 2.5  | 862.7367 | 862.7367  | 17.01964  | N/A           | 0.149254058        | 0.435683 |
| 3     | 5    | 1538.606 | 1538.606  | 30.35286  | N/A           | 0.282345441        | 0.824186 |
| 4     | 10   | 1761.574 | 1761.574  | 34.75145  | N/A           | 0.342574975        | 1        |

Gel name : TMS-TMF-4f\_caski bactin (Raw 1-D Image)

| Index | Name | Volume   | Adj. Vol. | % Adj. Vo | Concentration |  |  |
|-------|------|----------|-----------|-----------|---------------|--|--|
|       |      | INT*mm2  | INT*mm2   |           |               |  |  |
|       | (uM) |          |           |           |               |  |  |
| 1     | 0    | 5317.036 | 5317.036  | 25.98747  | N/A           |  |  |
| 2     | 2.5  | 5513.681 | 5513.681  | 26.94858  | N/A           |  |  |
| 3     | 5    | 5108.721 | 5108.721  | 24.96931  | N/A           |  |  |
| 4     | 10   | 4520.565 | 4520.565  | 22.09464  | N/A           |  |  |

Figure 2a - HeLa

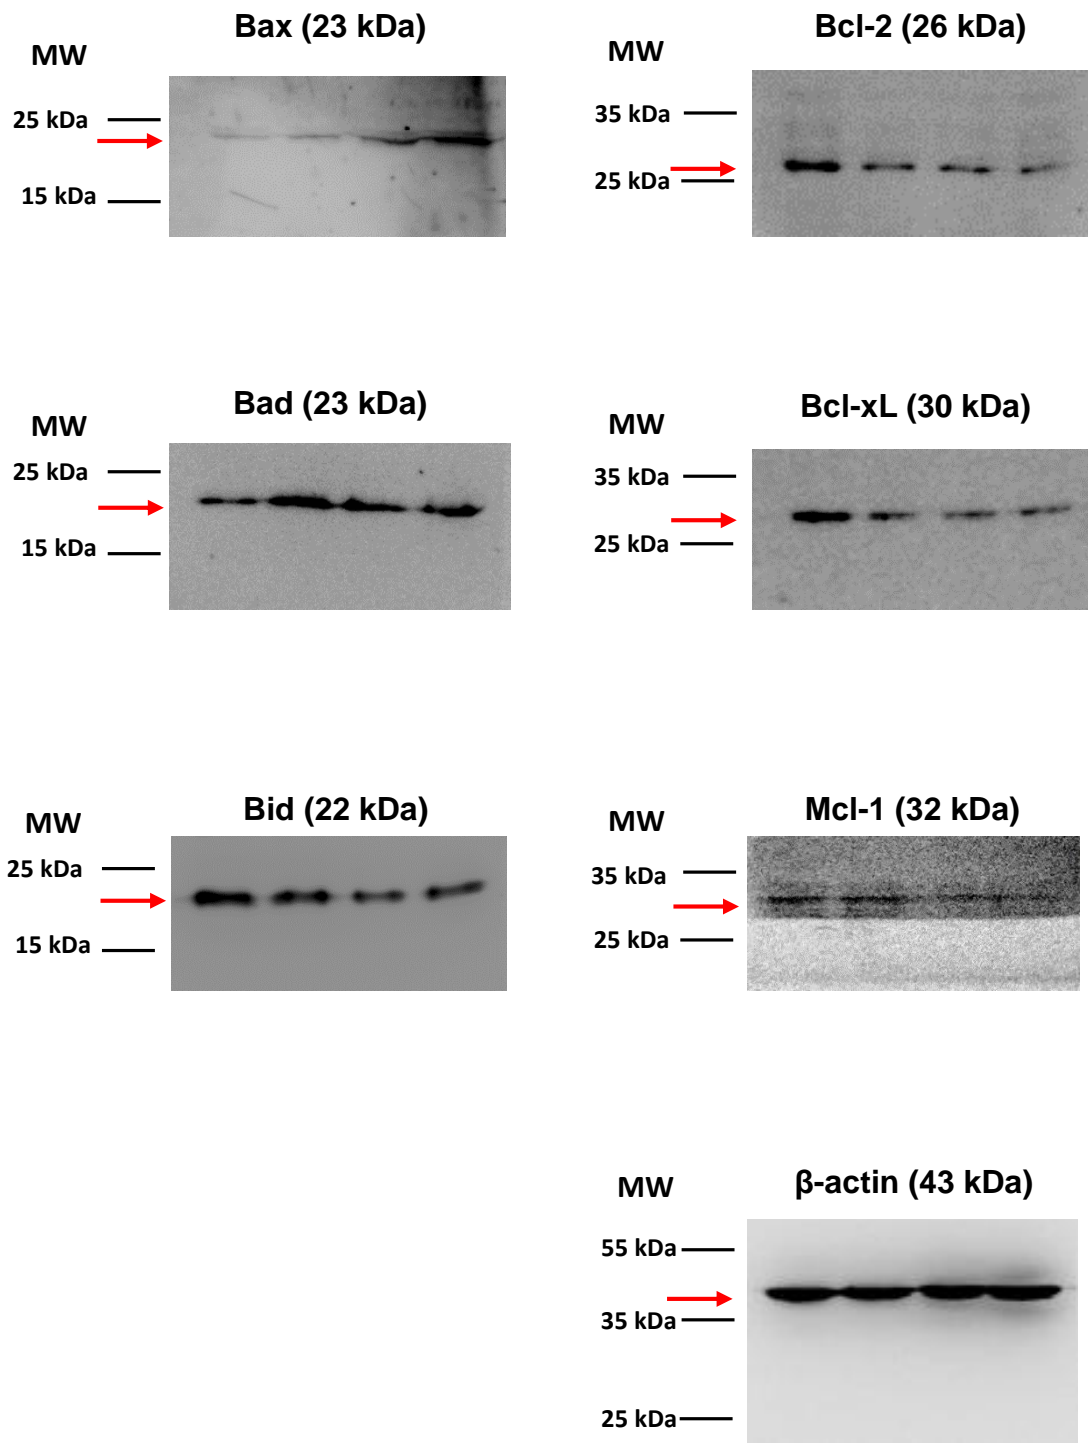

**Fig.2.a-HeLa**

**Gel name : TMS-TMF-4f\_HeLa Bax (Raw 1-D Image)**

| Index | Name | Volume   | Adj. Vol. | % Adj. Vo | Concentration |                  |              |
|-------|------|----------|-----------|-----------|---------------|------------------|--------------|
|       |      | INT*mm2  | INT*mm2   |           |               |                  |              |
|       | (uM) |          |           |           |               | <b>Bax/actin</b> | <b>Ratio</b> |
| 1     | 0    | 420.6443 | 420.6443  | 7.849663  | N/A           | 0.09365207       | 0.220302     |
| 2     | 2.5  | 440.716  | 440.716   | 8.224221  | N/A           | 0.094652643      | 0.222656     |
| 3     | 5    | 1291.754 | 1291.754  | 24.10548  | N/A           | 0.335265816      | 0.788662     |
| 4     | 10   | 1205.643 | 3205.643  | 59.82064  | N/A           | 0.425107222      | 1            |

**Gel name : TMS-TMF-4f\_HeLa Bad (Raw 1-D Image)**

| Index | Name | Volume   | Adj. Vol. | % Adj. Vo | Concentration |                  |              |
|-------|------|----------|-----------|-----------|---------------|------------------|--------------|
|       |      | INT*mm2  | INT*mm2   |           |               |                  |              |
|       | (uM) |          |           |           |               | <b>Bad/actin</b> | <b>Ratio</b> |
| 1     | 0    | 1587.409 | 1587.409  | 15.00977  | N/A           | 0.367821363      | 0.457216     |
| 2     | 2.5  | 3205.685 | 3305.685  | 31.25696  | N/A           | 0.678614531      | 0.843543     |
| 3     | 5    | 2781.758 | 2781.758  | 26.30296  | N/A           | 0.663552113      | 0.82482      |
| 4     | 10   | 2900.984 | 2900.984  | 27.4303   | N/A           | 0.804480936      | 1            |

**Gel name : TMS-TMF-4f\_HeLa Bid (Raw 1-D Image)**

| Index | Name | Volume   | Adj. Vol. | % Adj. Vo | Concentration |                  |              |
|-------|------|----------|-----------|-----------|---------------|------------------|--------------|
|       |      | INT*mm2  | INT*mm2   |           |               |                  |              |
|       | (uM) |          |           |           |               | <b>Bid/actin</b> | <b>Ratio</b> |
| 1     | 0    | 2711.679 | 2711.679  | 43.50266  | N/A           | 0.616544605      | 1            |
| 2     | 2.5  | 1829.444 | 1829.444  | 29.34923  | N/A           | 0.384188763      | 0.623132     |
| 3     | 5    | 750.2926 | 650.2926  | 10.43245  | N/A           | 0.180897269      | 0.293405     |
| 4     | 10   | 741.9478 | 1041.948  | 16.71566  | N/A           | 0.212667602      | 0.344935     |

**Gel name : TMS-TMF-4f\_HeLa Bcl-2 (Raw 1-D Image)**

| Index | Name | Volume   | Adj. Vol. | % Adj. Vo | Concentration |                    |              |
|-------|------|----------|-----------|-----------|---------------|--------------------|--------------|
|       |      | INT*mm2  | INT*mm2   |           |               |                    |              |
|       | (uM) |          |           |           |               | <b>Bcl-2/actin</b> | <b>Ratio</b> |
| 1     | 0    | 2434.805 | 2434.805  | 49.33963  | N/A           | 0.549801152        | 1            |
| 2     | 2.5  | 941.0734 | 941.0734  | 19.0702   | N/A           | 0.195186575        | 0.355013     |
| 3     | 5    | 940.6147 | 940.6147  | 19.0609   | N/A           | 0.221883756        | 0.403571     |
| 4     | 10   | 618.2927 | 618.2927  | 12.52927  | N/A           | 0.176662201        | 0.32132      |

**Gel name : TMS-TMF-4f\_HeLa Bcl XI (Raw 1-D Image)**

| Index | Name | Volume   | Adj. Vol. | % Adj. Vo | Concentration |                     |              |
|-------|------|----------|-----------|-----------|---------------|---------------------|--------------|
|       |      | INT*mm2  | INT*mm2   |           |               |                     |              |
|       | (uM) |          |           |           |               | <b>Bcl-xL/actin</b> | <b>Ratio</b> |
| 1     | 0    | 2771.407 | 2771.407  | 46.97092  | N/A           | 0.617261762         | 1            |
| 2     | 2.5  | 1217.345 | 1217.345  | 20.63206  | N/A           | 0.243445272         | 0.394396     |
| 3     | 5    | 981.9336 | 981.9336  | 16.64221  | N/A           | 0.222448293         | 0.360379     |
| 4     | 10   | 929.5753 | 929.5753  | 15.75482  | N/A           | 0.253516998         | 0.410712     |

**Gel name : TMS-TMF-4f\_hela mcl-1 (Raw 1-D Image)**

| Index | Name | Volume   | Adj. Vol. | % Adj. Vo | Concentration |                    |              |
|-------|------|----------|-----------|-----------|---------------|--------------------|--------------|
|       |      | INT*mm2  | INT*mm2   |           |               |                    |              |
|       | (uM) |          |           |           |               | <b>Mcl-1/actin</b> | <b>Ratio</b> |
| 1     | 0    | 2388.239 | 2388.239  | 26.62026  | N/A           | 0.728666776        | 1            |
| 2     | 2.5  | 2370.06  | 2370.06   | 26.41763  | N/A           | 0.70805205         | 0.91288      |
| 3     | 5    | 2061.358 | 2061.358  | 22.97671  | N/A           | 0.642737881        | 0.882074     |
| 4     | 10   | 2151.852 | 2151.852  | 23.9854   | N/A           | 0.62633588         | 0.859564     |

**Gel name : TMS-TMF-4f\_HeLa Bcl2 fam bactin (Raw 1-D Image)**

| Index | Name | Volume   | Adj. Vol. | % Adj. Vo | Concentration |  |  |
|-------|------|----------|-----------|-----------|---------------|--|--|
|       |      | INT*mm2  | INT*mm2   |           |               |  |  |
|       | (uM) |          |           |           |               |  |  |
| 1     | 0    | 4373.497 | 4373.497  | 26.44293  | N/A           |  |  |
| 2     | 2.5  | 4689.625 | 4689.625  | 28.3543   | N/A           |  |  |
| 3     | 5    | 4085.182 | 4085.182  | 24.69973  | N/A           |  |  |
| 4     | 10   | 3391.076 | 3391.076  | 20.50304  | N/A           |  |  |

Figure 2a - CaSki

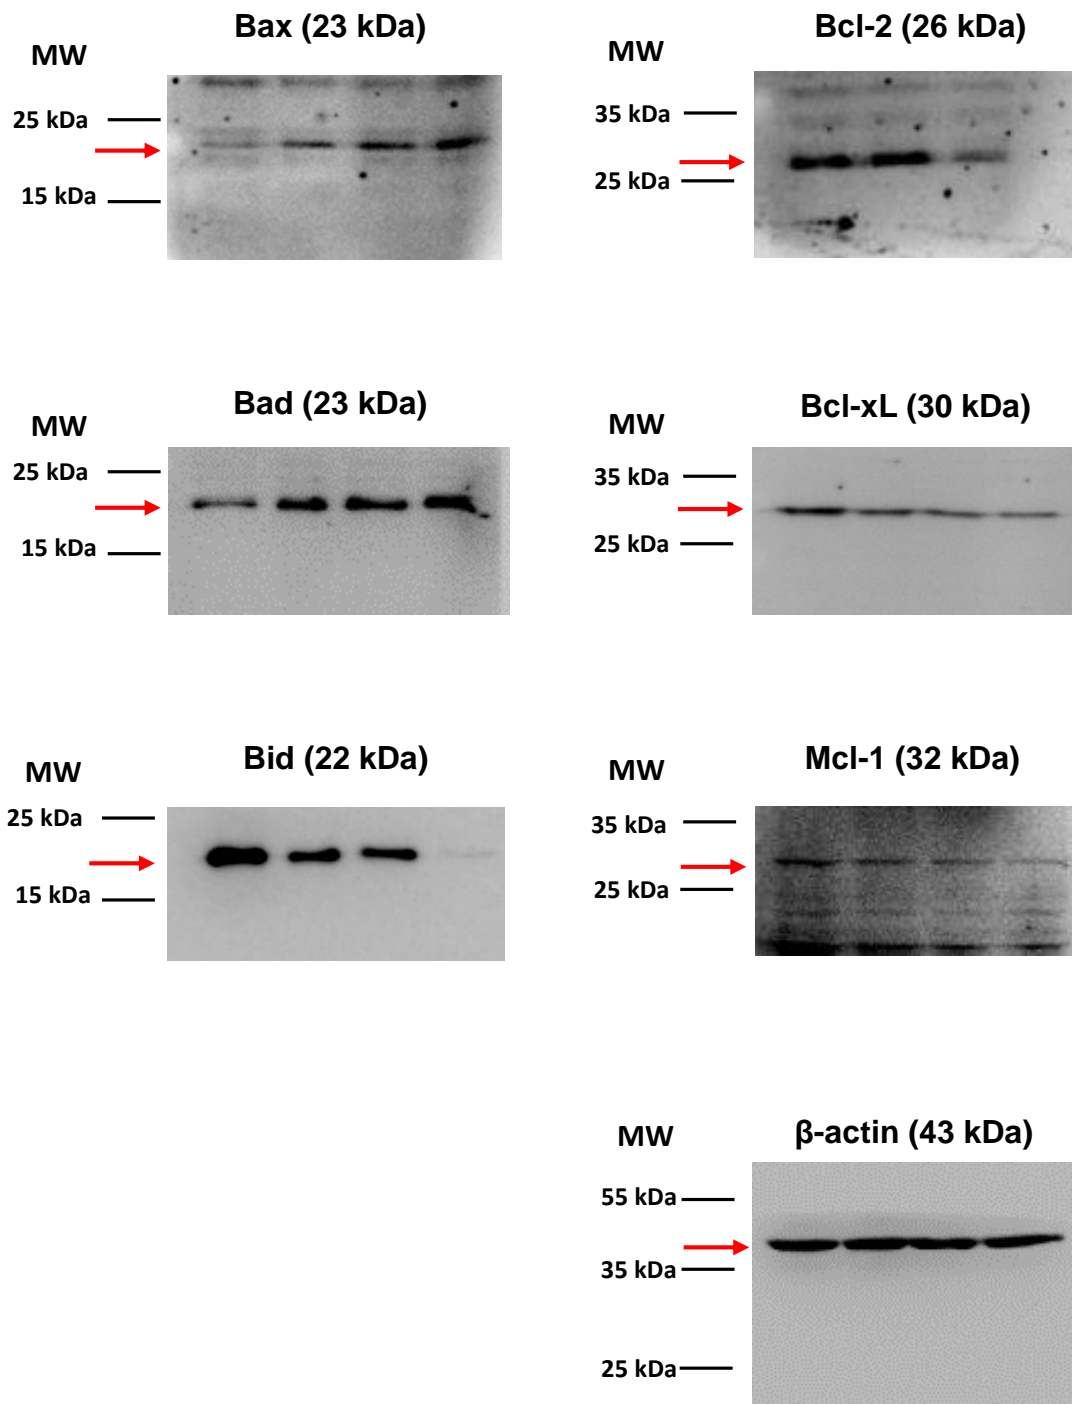

Fig.2.a-CaSki

Gel name : TMS-TMF-4f \_CaSki Bax (Raw 1-D Image)

| Index | Name | Volume   | Adj. Vol. | % Adj. Vo | Concentration |                  |              |
|-------|------|----------|-----------|-----------|---------------|------------------|--------------|
|       |      | INT*mm2  | INT*mm2   |           |               |                  |              |
|       | (uM) |          |           |           |               | <b>Bax/actin</b> | <b>Ratio</b> |
| 1     | 0    | 239.1393 | 239.1393  | 4.789525  | N/A           | 0.074053383      | 0.077633     |
| 2     | 2.5  | 707.2101 | 707.2101  | 14.16413  | N/A           | 0.251850997      | 0.264026     |
| 3     | 5    | 1641.947 | 1641.947  | 32.8852   | N/A           | 0.542587131      | 0.568816     |
| 4     | 10   | 2404.669 | 2404.669  | 48.16114  | N/A           | 0.953888406      | 1            |

Gel name : TMS-TMF-4f \_CaSki Bad (Raw 1-D Image)

| Index | Name | Volume   | Adj. Vol. | % Adj. Vo | Concentration |                  |              |
|-------|------|----------|-----------|-----------|---------------|------------------|--------------|
|       |      | INT*mm2  | INT*mm2   |           |               |                  |              |
|       | (uM) |          |           |           |               | <b>Bad/actin</b> | <b>Ratio</b> |
| 1     | 0    | 1139.238 | 1139.238  | 11.7019   | N/A           | 0.368884284      | 0.273061     |
| 2     | 2.5  | 2439.823 | 2439.823  | 25.06111  | N/A           | 0.86617171       | 0.641171     |
| 3     | 5    | 2819.435 | 2819.435  | 28.96037  | N/A           | 0.932783726      | 0.690479     |
| 4     | 10   | 3336.997 | 3336.997  | 34.27661  | N/A           | 1.350922001      | 1            |

Gel name : TMS-TMF-4f \_CaSki Bid (Raw 1-D Image)

| Index | Name | Volume   | Adj. Vol. | % Adj. Vo | Concentration |                  |              |
|-------|------|----------|-----------|-----------|---------------|------------------|--------------|
|       |      | INT*mm2  | INT*mm2   |           |               |                  |              |
|       | (uM) |          |           |           |               | <b>Bid/actin</b> | <b>Ratio</b> |
| 1     | 0    | 4383.619 | 4383.619  | 50.73676  | N/A           | 1.431648793      | 1            |
| 2     | 2.5  | 2219.895 | 2219.895  | 25.69345  | N/A           | 0.78809729       | 0.550482     |
| 3     | 5    | 2036.412 | 2036.412  | 23.56978  | N/A           | 0.676429227      | 0.472483     |
| 4     | 10   | 0        | 0         | 0         | N/A           | 0                | 0            |

Gel name : TMS-TMF-4f \_CaSki Bcl-2 (Raw 1-D Image)

| Index | Name | Volume   | Adj. Vol. | % Adj. Vo | Concentration |                    |              |
|-------|------|----------|-----------|-----------|---------------|--------------------|--------------|
|       |      | INT*mm2  | INT*mm2   |           |               |                    |              |
|       | (uM) |          |           |           |               | <b>Bcl-2/actin</b> | <b>Ratio</b> |
| 1     | 0    | 3480.767 | 3480.767  | 46.05124  | N/A           | 1.120519719        | 1            |
| 2     | 2.5  | 3216.194 | 3216.194  | 42.55089  | N/A           | 1.11224746         | 0.992617     |
| 3     | 5    | 820.8443 | 820.8443  | 10.85993  | N/A           | 0.268779384        | 0.23987      |
| 4     | 10   | 40.65942 | 40.65942  | 0.537932  | N/A           | 0.016262915        | 0.014514     |

Gel name : TMS-TMF-4f \_CaSki Bclxl (Raw 1-D Image)

| Index | Name | Volume   | Adj. Vol. | % Adj. Vo | Concentration |                     |              |
|-------|------|----------|-----------|-----------|---------------|---------------------|--------------|
|       |      | INT*mm2  | INT*mm2   |           |               |                     |              |
|       | (uM) |          |           |           |               | <b>Bcl-xL/actin</b> | <b>Ratio</b> |
| 1     | 0    | 2259.809 | 2259.809  | 48.79576  | N/A           | 0.752771501         | 1            |
| 2     | 2.5  | 1092.614 | 1092.614  | 23.59267  | N/A           | 0.414477479         | 0.550602     |
| 3     | 5    | 1082.435 | 1082.435  | 23.37288  | N/A           | 0.361023196         | 0.479592     |
| 4     | 10   | 196.3007 | 196.3007  | 4.238694  | N/A           | 0.07966828          | 0.105833     |

Gel name : TMS-TMF-4f \_caski mcl-1 (Raw 1-D Image)

| Index | Name | Volume   | Adj. Vol. | % Adj. Vo | Concentration |                    |              |
|-------|------|----------|-----------|-----------|---------------|--------------------|--------------|
|       |      | INT*mm2  | INT*mm2   |           |               |                    |              |
|       | (uM) |          |           |           |               | <b>Mcl-1/actin</b> | <b>Ratio</b> |
| 1     | 0    | 2666.748 | 2666.748  | 38.57685  | N/A           | 0.71497565         | 1            |
| 2     | 2.5  | 2018.491 | 2018.491  | 29.19925  | N/A           | 0.479967517        | 0.671306     |
| 3     | 5    | 1485.015 | 1485.015  | 21.48205  | N/A           | 0.377944331        | 0.528611     |
| 4     | 10   | 742.5649 | 742.5649  | 10.74185  | N/A           | 0.2010054          | 0.281136     |

Gel name : TMS-TMF-4f \_CaSki bcl2 fam bactin (Raw 1-D Image)

| Index | Name | Volume   | Adj. Vol. | % Adj. Vo | Concentration |  |  |
|-------|------|----------|-----------|-----------|---------------|--|--|
|       |      | INT*mm2  | INT*mm2   |           |               |  |  |
|       | (uM) |          |           |           |               |  |  |
| 1     | 0    | 3061.614 | 3061.614  | 26.9949   | N/A           |  |  |
| 2     | 2.5  | 2795.808 | 2795.808  | 24.65123  | N/A           |  |  |
| 3     | 5    | 3012.037 | 3012.037  | 26.55777  | N/A           |  |  |
| 4     | 10   | 2471.995 | 2471.995  | 21.7961   | N/A           |  |  |

Figure 2c

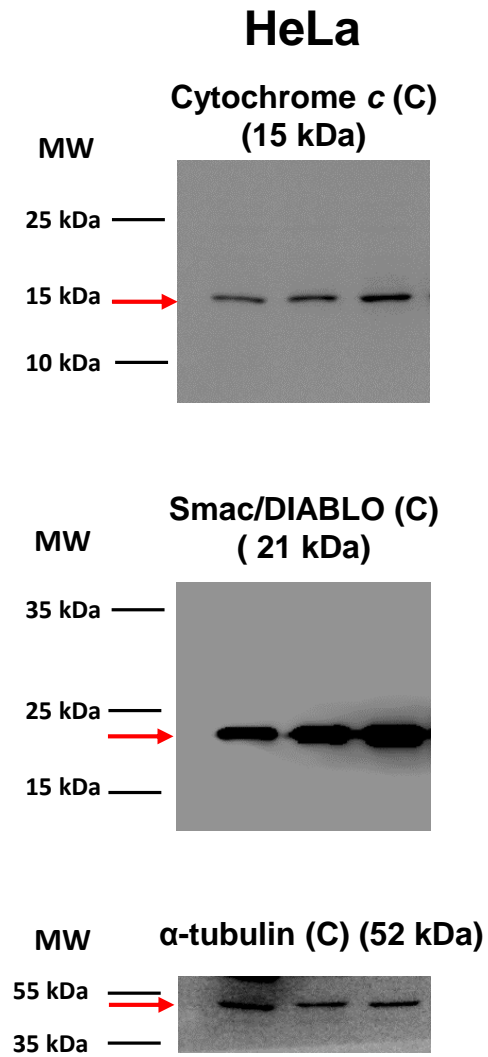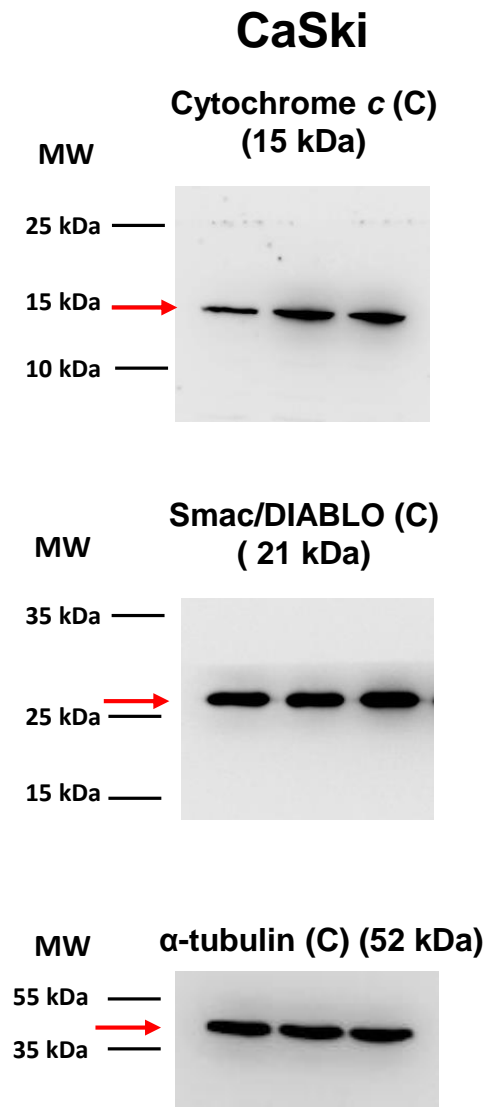

Fig.2.c-HeLa

| Gel name : TMS-TMF-4f_HeLa cytoC (Raw 1-D Image) |      |          |           |           |               |                      |          |
|--------------------------------------------------|------|----------|-----------|-----------|---------------|----------------------|----------|
| Index                                            | Name | Volume   | Adj. Vol. | % Adj. Vo | Concentration |                      |          |
|                                                  |      | INT*mm2  | INT*mm2   |           |               |                      |          |
|                                                  | h    |          |           |           |               | cytochrome c/tubulin | Ratio    |
| 1                                                | 0    | 535.8843 | 535.8843  | 20.04548  | N/A           | 0.291522626          | 0.192273 |
| 2                                                | 12   | 771.8695 | 771.8695  | 28.87282  | N/A           | 0.836695366          | 0.551841 |
| 3                                                | 24   | 1365.589 | 1365.589  | 51.0817   | N/A           | 1.516188763          | 1        |

| Gel name : TMS-TMF-4f_HeLa smac (Raw 1-D Image) |      |          |           |           |               |              |          |
|-------------------------------------------------|------|----------|-----------|-----------|---------------|--------------|----------|
| Index                                           | Name | Volume   | Adj. Vol. | % Adj. Vo | Concentration |              |          |
|                                                 |      | INT*mm2  | INT*mm2   |           |               |              |          |
|                                                 | h    |          |           |           |               | smac/tubulin | Ratio    |
| 1                                               | 0    | 3252.381 | 3252.381  | 22.05592  | N/A           | 1.767007173  | 0.238529 |
| 2                                               | 12   | 4880.736 | 4880.736  | 33.09857  | N/A           | 5.328878252  | 0.719346 |
| 3                                               | 24   | 6612.948 | 6612.948  | 44.84551  | N/A           | 7.407946249  | 1        |

| Gel name : TMS-TMF-4f_HeLa tubulin (Raw 1-D Image) |      |          |           |           |               |  |  |
|----------------------------------------------------|------|----------|-----------|-----------|---------------|--|--|
| Index                                              | Name | Volume   | Adj. Vol. | % Adj. Vo | Concentration |  |  |
|                                                    |      | INT*mm2  | INT*mm2   |           |               |  |  |
|                                                    | h    |          |           |           |               |  |  |
| 1                                                  | 0    | 1892.355 | 1892.355  | 50.42173  | N/A           |  |  |
| 2                                                  | 12   | 949.1595 | 949.1595  | 25.29032  | N/A           |  |  |
| 3                                                  | 24   | 911.5395 | 911.5395  | 24.28794  | N/A           |  |  |

Fig.2.c-CaSki

| Gel name : TMS-TMF-4f_Caski cyto c.tif (Raw 1-D Image) |      |          |           |           |               |                      |          |
|--------------------------------------------------------|------|----------|-----------|-----------|---------------|----------------------|----------|
| Index                                                  | Name | Volume   | Adj. Vol. | % Adj. Vo | Concentration |                      |          |
|                                                        |      | INT*mm2  | INT*mm2   |           |               |                      |          |
|                                                        | h    |          |           |           |               | cytochrome c/tubulin | Ratio    |
| 1                                                      | 0    | 1181.819 | 1181.819  | 18.75253  | N/A           | 0.371166742          | 0.447989 |
| 2                                                      | 12   | 2640.482 | 2640.482  | 41.89791  | N/A           | 0.845990331          | 1.021089 |
| 3                                                      | 24   | 2479.881 | 2479.881  | 39.34956  | N/A           | 0.828517978          | 1        |

| Gel name : TMS-TMF-4f_caski smac (Raw 1-D Image) |      |          |           |           |               |              |          |
|--------------------------------------------------|------|----------|-----------|-----------|---------------|--------------|----------|
| Index                                            | Name | Volume   | Adj. Vol. | % Adj. Vo | Concentration |              |          |
|                                                  |      | INT*mm2  | INT*mm2   |           |               |              |          |
|                                                  | h    |          |           |           |               | smac/tubulin | Ratio    |
| 1                                                | 0    | 3682.143 | 3682.143  | 31.28685  | N/A           | 1.144623038  | 0.781234 |
| 2                                                | 12   | 3660.552 | 3660.552  | 31.10339  | N/A           | 1.182337307  | 0.806975 |
| 3                                                | 24   | 4426.285 | 4426.285  | 37.60976  | N/A           | 1.465147688  | 1        |

| Gel name : TMS-TMF-4f_Caski bactin.tif (Raw 1-D Image) |      |          |           |           |               |  |  |
|--------------------------------------------------------|------|----------|-----------|-----------|---------------|--|--|
| Index                                                  | Name | Volume   | Adj. Vol. | % Adj. Vo | Concentration |  |  |
|                                                        |      | INT*mm2  | INT*mm2   |           |               |  |  |
|                                                        | h    |          |           |           |               |  |  |
| 1                                                      | 0    | 3285.27  | 3285.27   | 34.46705  | N/A           |  |  |
| 2                                                      | 12   | 3197.04  | 3197.04   | 33.54141  | N/A           |  |  |
| 3                                                      | 24   | 3049.313 | 3049.313  | 31.99154  | N/A           |  |  |

Figure 3a

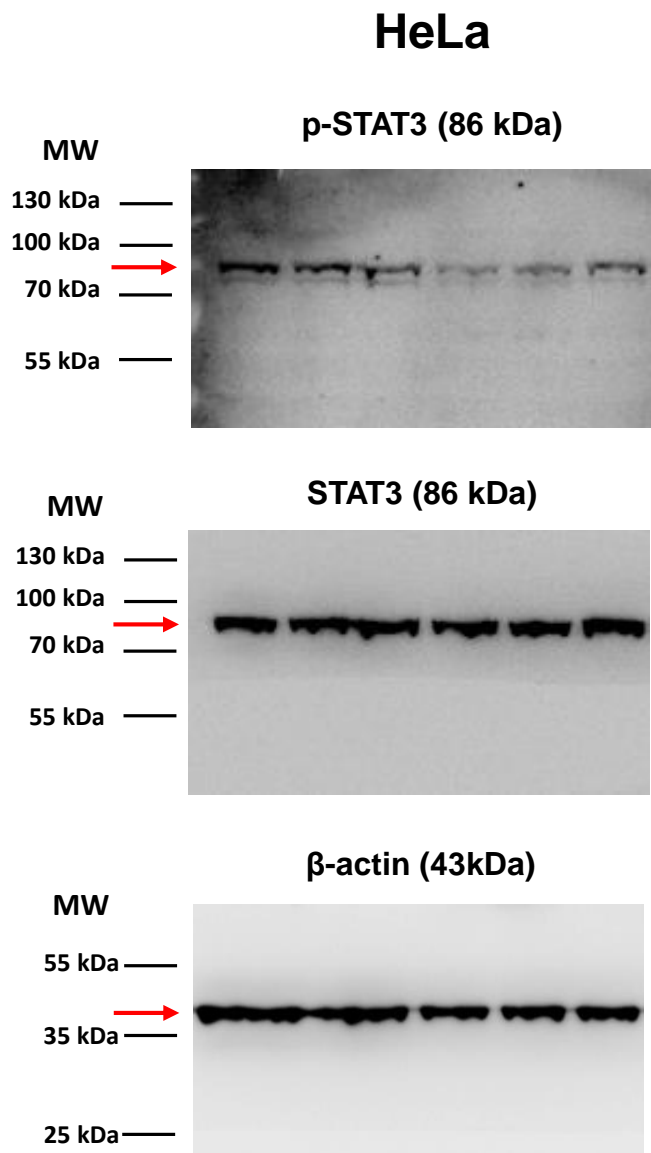

Fig.3.a-HeLa

Gel name : TMS-TMF-4f\_HeLa pSTAT3 (Raw 1-D Image)

| Index | Name | Volume   | Adj. Vol. | % Adj. Vo | Concentration |                      |              |
|-------|------|----------|-----------|-----------|---------------|----------------------|--------------|
|       |      | INT*mm2  | INT*mm2   |           |               |                      |              |
|       | min  |          |           |           |               | <b>p-stat3/stat3</b> | <b>Ratio</b> |
| 1     | 0    | 3016.424 | 3016.424  | 35.33929  | N/A           | 0.799890149          | 1            |
| 2     | 5    | 1821.473 | 1821.473  | 21.33969  | N/A           | 0.512225391          | 0.64037      |
| 3     | 10   | 1269.417 | 1269.417  | 14.87201  | N/A           | 0.327827951          | 0.409841     |
| 4     | 15   | 671.2532 | 671.2532  | 7.864149  | N/A           | 0.19211649           | 0.240179     |
| 5     | 30   | 749.5326 | 749.5326  | 8.781242  | N/A           | 0.209141842          | 0.261463     |
| 6     | 60   | 1007.511 | 1007.511  | 11.80361  | N/A           | 0.236063403          | 0.29512      |

Gel name : TMS-TMF-4f\_HeLa STAT3 (Raw 1-D Image)

| Index | Name | Volume   | Adj. Vol. | % Adj. Vo | Concentration |  |  |
|-------|------|----------|-----------|-----------|---------------|--|--|
|       |      | INT*mm2  | INT*mm2   |           |               |  |  |
|       | min  |          |           |           |               |  |  |
| 1     | 0    | 3654.33  | 3654.33   | 16.12293  | N/A           |  |  |
| 2     | 5    | 3513.57  | 3513.57   | 15.5019   | N/A           |  |  |
| 3     | 10   | 3903.677 | 3903.677  | 17.22305  | N/A           |  |  |
| 4     | 15   | 3607.161 | 3607.161  | 15.91482  | N/A           |  |  |
| 5     | 30   | 3710.875 | 3710.875  | 16.37241  | N/A           |  |  |
| 6     | 60   | 4275.805 | 4275.805  | 18.86489  | N/A           |  |  |

Gel name : TMS-TMF-4f\_HeLa bactin (Raw 1-D Image)

| Index | Name | Volume   | Adj. Vol. | % Adj. Vo | Concentration |  |  |
|-------|------|----------|-----------|-----------|---------------|--|--|
|       |      | INT*mm2  | INT*mm2   |           |               |  |  |
|       | min  |          |           |           |               |  |  |
| 1     | 0    | 4249.684 | 4249.684  | 18.39252  | N/A           |  |  |
| 2     | 5    | 3736.71  | 3736.71   | 16.17238  | N/A           |  |  |
| 3     | 10   | 4373.726 | 4373.726  | 18.92937  | N/A           |  |  |
| 4     | 15   | 3510.818 | 3510.818  | 15.19472  | N/A           |  |  |
| 5     | 30   | 3598.731 | 3598.731  | 15.57521  | N/A           |  |  |
| 6     | 60   | 3635.835 | 3635.835  | 15.7358   | N/A           |  |  |

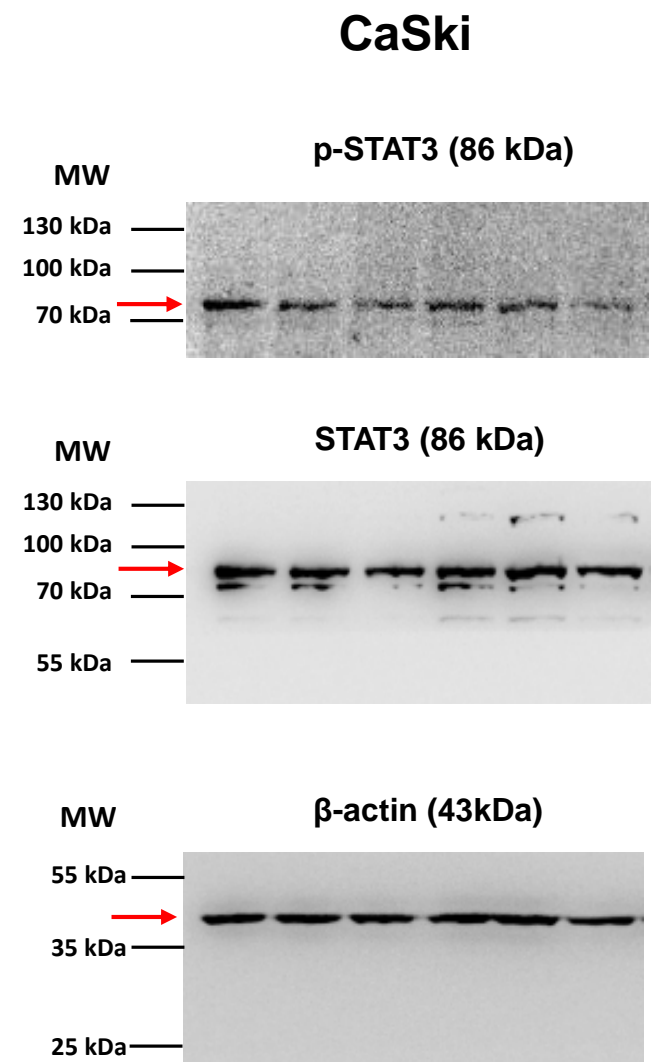

Fig.3.a-CaSki

Gel name : TMS-TMF-4f\_Caski pSTAT3 (Raw 1-D Image)

| Index | Name | Volume   | Adj. Vol. | % Adj. Vo | Concentration |                      |              |
|-------|------|----------|-----------|-----------|---------------|----------------------|--------------|
|       |      | INT*mm2  | INT*mm2   |           |               |                      |              |
|       | min  |          |           |           |               | <b>p-stat3/stat3</b> | <b>Ratio</b> |
| 1     | 0    | 2223.795 | 2223.795  | 24.4555   | N/A           | 0.737024054          | 1            |
| 2     | 5    | 1404.556 | 1404.556  | 15.44618  | N/A           | 0.534662055          | 0.725434     |
| 3     | 10   | 1167.854 | 1167.854  | 12.84312  | N/A           | 0.527930481          | 0.7163       |
| 4     | 15   | 1637.416 | 1837.416  | 20.20642  | N/A           | 0.556708883          | 0.755347     |
| 5     | 30   | 1569.775 | 1569.775  | 17.26312  | N/A           | 0.494582594          | 0.671054     |
| 6     | 60   | 889.8334 | 889.8334  | 9.785669  | N/A           | 0.34994909           | 0.474814     |

Gel name : TMS-TMF-4f\_Caski stat3 (Raw 1-D Image)

| Index | Name | Volume   | Adj. Vol. | % Adj. Vo | Concentration |  |  |
|-------|------|----------|-----------|-----------|---------------|--|--|
|       |      | INT*mm2  | INT*mm2   |           |               |  |  |
|       | min  |          |           |           |               |  |  |
| 1     | 0    | 2939.378 | 2939.378  | 18.5095   | N/A           |  |  |
| 2     | 5    | 2614.361 | 2614.361  | 16.46284  | N/A           |  |  |
| 3     | 10   | 2141.214 | 2141.214  | 13.4834   | N/A           |  |  |
| 4     | 15   | 2824.769 | 2824.769  | 17.7878   | N/A           |  |  |
| 5     | 30   | 2997.786 | 2997.786  | 18.87731  | N/A           |  |  |
| 6     | 60   | 2362.863 | 2362.863  | 14.87914  | N/A           |  |  |

Gel name : TMS-TMF-4f\_caski bactin (Raw 1-D Image)

| Index | Name | Volume   | Adj. Vol. | % Adj. Vo | Concentration |  |  |
|-------|------|----------|-----------|-----------|---------------|--|--|
|       |      | INT*mm2  | INT*mm2   |           |               |  |  |
|       | min  |          |           |           |               |  |  |
| 1     | 0    | 2282.318 | 2282.318  | 17.06926  | N/A           |  |  |
| 2     | 5    | 2294.246 | 2294.246  | 17.15847  | N/A           |  |  |
| 3     | 10   | 2093.043 | 2093.043  | 15.65368  | N/A           |  |  |
| 4     | 15   | 2285.329 | 2285.329  | 17.09178  | N/A           |  |  |
| 5     | 30   | 2562.031 | 2562.031  | 19.16121  | N/A           |  |  |
| 6     | 60   | 1853.961 | 1853.961  | 13.86561  | N/A           |  |  |

**Figure 3b**

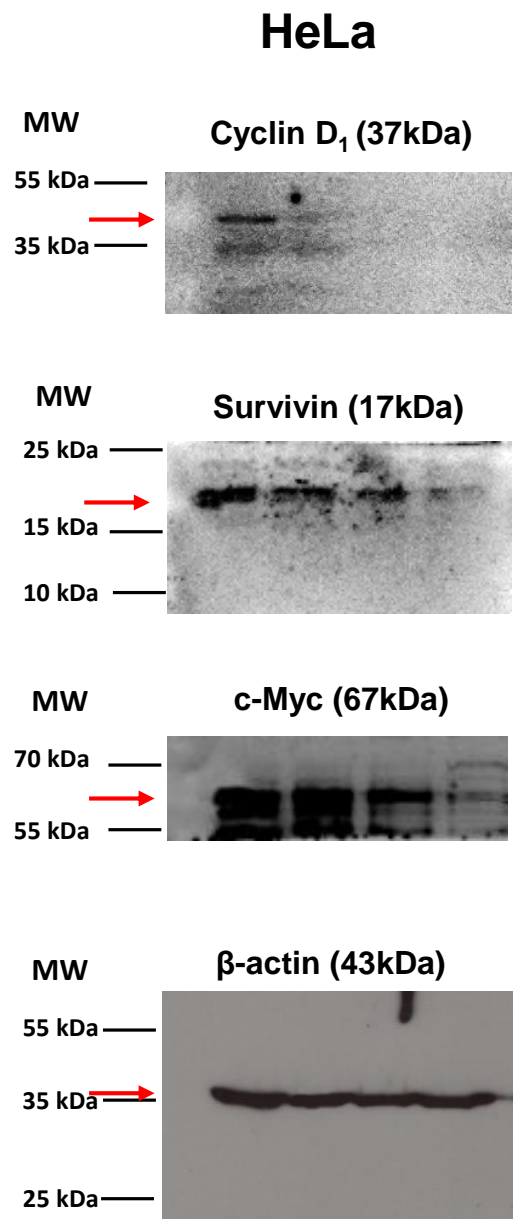

**Fig.3.b-HeLa**

**Gel name : TMS-TMF-4f\_hela cyclin d1 (Raw 1-D Image)**

| Index | Name | Volume   | Adj. Vol. | % Adj. Vo | Concentration |                       |              |
|-------|------|----------|-----------|-----------|---------------|-----------------------|--------------|
|       |      | INT*mm2  | INT*mm2   |           |               |                       |              |
|       | (uM) |          |           |           |               | <b>cyclinD1/actin</b> | <b>Ratio</b> |
| 1     | 0    | 3434.689 | 3434.689  | 51.04619  | N/A           | 1.05357874            | 1            |
| 2     | 2.5  | 1808.369 | 1808.369  | 26.87591  | N/A           | 0.562163171           | 0.533575     |
| 3     | 5    | 783.9125 | 783.9125  | 11.65047  | N/A           | 0.255309946           | 0.242326     |
| 4     | 10   | 701.6187 | 701.6187  | 10.42743  | N/A           | 0.202126957           | 0.191848     |

**Gel name : TMS-TMF-4f\_hela survivin (Raw 1-D Image)**

| Index | Name | Volume   | Adj. Vol. | % Adj. Vo | Concentration |                       |              |
|-------|------|----------|-----------|-----------|---------------|-----------------------|--------------|
|       |      | INT*mm2  | INT*mm2   |           |               |                       |              |
|       | (uM) |          |           |           |               | <b>survivin/actin</b> | <b>Ratio</b> |
| 1     | 0    | 4120.336 | 4120.336  | 31.55236  | N/A           | 1.2741059             | 1            |
| 2     | 2.5  | 3731.29  | 3731.29   | 28.57315  | N/A           | 1.132838929           | 0.889125     |
| 3     | 5    | 3347.75  | 3347.75   | 25.63611  | N/A           | 1.038411281           | 0.815012     |
| 4     | 10   | 1859.351 | 1859.351  | 14.23838  | N/A           | 0.52098631            | 0.408903     |

**Gel name : TMS-TMF-4f\_hela c-myc (Raw 1-D Image)**

| Index | Name | Volume   | Adj. Vol. | % Adj. Vo | Concentration |                    |              |
|-------|------|----------|-----------|-----------|---------------|--------------------|--------------|
|       |      | INT*mm2  | INT*mm2   |           |               |                    |              |
|       | (uM) |          |           |           |               | <b>c-Myc/actin</b> | <b>Ratio</b> |
| 1     | 0    | 6451.973 | 6451.973  | 27.127    | N/A           | 1.99394574         | 1            |
| 2     | 2.5  | 6530.109 | 6530.109  | 27.45551  | N/A           | 2.013035718        | 1.009574     |
| 3     | 5    | 6196.518 | 6196.518  | 26.05295  | N/A           | 1.973521352        | 0.989757     |
| 4     | 10   | 4605.726 | 4605.726  | 19.36454  | N/A           | 1.335423439        | 0.669739     |

**Gel name : TMS-TMF-4f\_hela bactin (Raw 1-D Image)**

| Index | Name | Volume   | Adj. Vol. | % Adj. Vo | Concentration |  |  |
|-------|------|----------|-----------|-----------|---------------|--|--|
|       |      | INT*mm2  | INT*mm2   |           |               |  |  |
|       | (uM) |          |           |           |               |  |  |
| 1     | 0    | 3614.301 | 4152.766  | 27.59569  | N/A           |  |  |
| 2     | 2.5  | 3614.301 | 3614.301  | 24.01752  | N/A           |  |  |
| 3     | 5    | 3550.244 | 3550.244  | 23.59185  | N/A           |  |  |
| 4     | 10   | 3731.29  | 3731.29   | 24.79493  | N/A           |  |  |

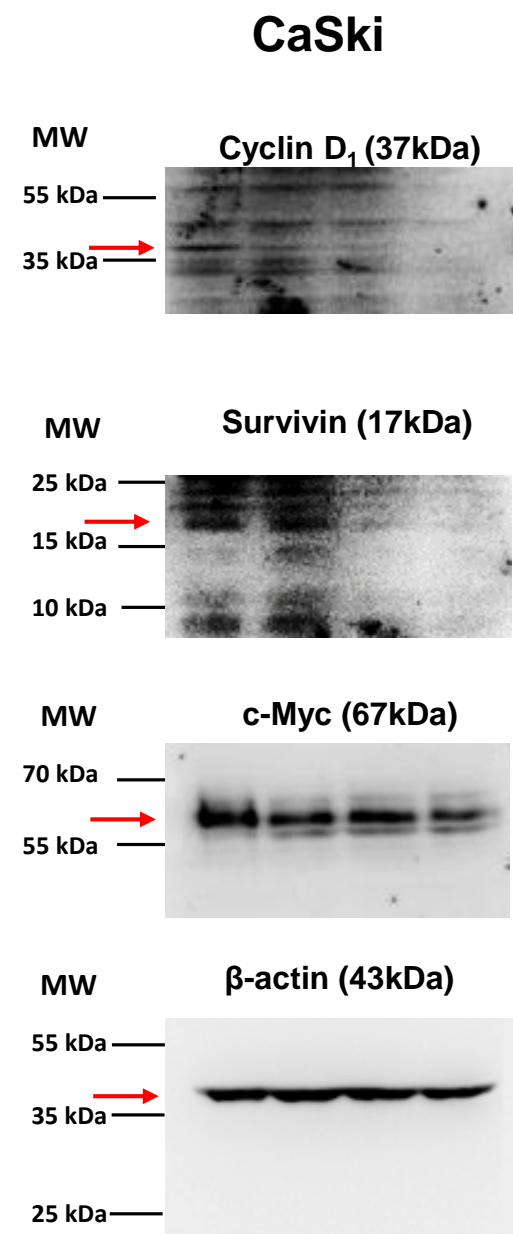

**Fig.3.b-CaSki**

**Gel name : TMS-TMF-4f\_caski cyclin d1 (Raw 1-D Image)**

| Index | Name | Volume   | Adj. Vol. | % Adj. Vo | Concentration |                       |              |
|-------|------|----------|-----------|-----------|---------------|-----------------------|--------------|
|       |      | INT*mm2  | INT*mm2   |           |               |                       |              |
|       | (uM) |          |           |           |               | <b>cyclinD1/actin</b> | <b>Ratio</b> |
| 1     | 0    | 2293.214 | 2293.214  | 39.94985  | N/A           | 0.551602163           | 1            |
| 2     | 2.5  | 1878.19  | 1878.19   | 32.71975  | N/A           | 0.402803441           | 0.730243     |
| 3     | 5    | 1060.07  | 1060.07   | 18.46736  | N/A           | 0.233508117           | 0.423327     |
| 4     | 10   | 508.7589 | 508.7589  | 8.863036  | N/A           | 0.126922109           | 0.230097     |

**Gel name : TMS-TMF-4f\_caski survivin (Raw 1-D Image)**

| Index | Name | Volume   | Adj. Vol. | % Adj. Vo | Concentration |                       |              |
|-------|------|----------|-----------|-----------|---------------|-----------------------|--------------|
|       |      | INT*mm2  | INT*mm2   |           |               |                       |              |
|       | (uM) |          |           |           |               | <b>survivin/actin</b> | <b>Ratio</b> |
| 1     | 0    | 3238.646 | 3238.646  | 37.98768  | N/A           | 0.822183482           | 1            |
| 2     | 2.5  | 3839.964 | 3839.964  | 45.04083  | N/A           | 0.890138524           | 1.082652     |
| 3     | 5    | 1035.267 | 1035.267  | 12.14316  | N/A           | 0.239015498           | 0.290708     |
| 4     | 10   | 411.6408 | 411.6408  | 4.828338  | N/A           | 0.112626401           | 0.136985     |

**Gel name : TMS-TMF-4f\_caski c-myc (Raw 1-D Image)**

| Index | Name | Volume   | Adj. Vol. | % Adj. Vo | Concentration |                    |              |
|-------|------|----------|-----------|-----------|---------------|--------------------|--------------|
|       |      | INT*mm2  | INT*mm2   |           |               |                    |              |
|       | (uM) |          |           |           |               | <b>c-Myc/actin</b> | <b>Ratio</b> |
| 1     | 0    | 4559.876 | 4559.876  | 30.9181   | N/A           | 1.226497134        | 1            |
| 2     | 2.5  | 3638.76  | 3638.76   | 24.6725   | N/A           | 0.90926595         | 0.741352     |
| 3     | 5    | 3948.15  | 3948.15   | 26.77031  | N/A           | 1.013043415        | 0.825965     |
| 4     | 10   | 2601.457 | 2601.457  | 17.6391   | N/A           | 0.770287048        | 0.628038     |

**Gel name : TMS-TMF-4f\_caski bactin (Raw 1-D Image)**

| Index | Name | Volume   | Adj. Vol. | % Adj. Vo | Concentration |  |  |
|-------|------|----------|-----------|-----------|---------------|--|--|
|       |      | INT*mm2  | INT*mm2   |           |               |  |  |
|       | (uM) |          |           |           |               |  |  |
| 1     | 0    | 3689.771 | 3689.771  | 24.84333  | N/A           |  |  |
| 2     | 2.5  | 3953.856 | 3953.856  | 26.62143  | N/A           |  |  |
| 3     | 5    | 3840.881 | 3840.881  | 25.86076  | N/A           |  |  |
| 4     | 10   | 3367.649 | 3367.649  | 22.67448  | N/A           |  |  |

**Figure 3c**

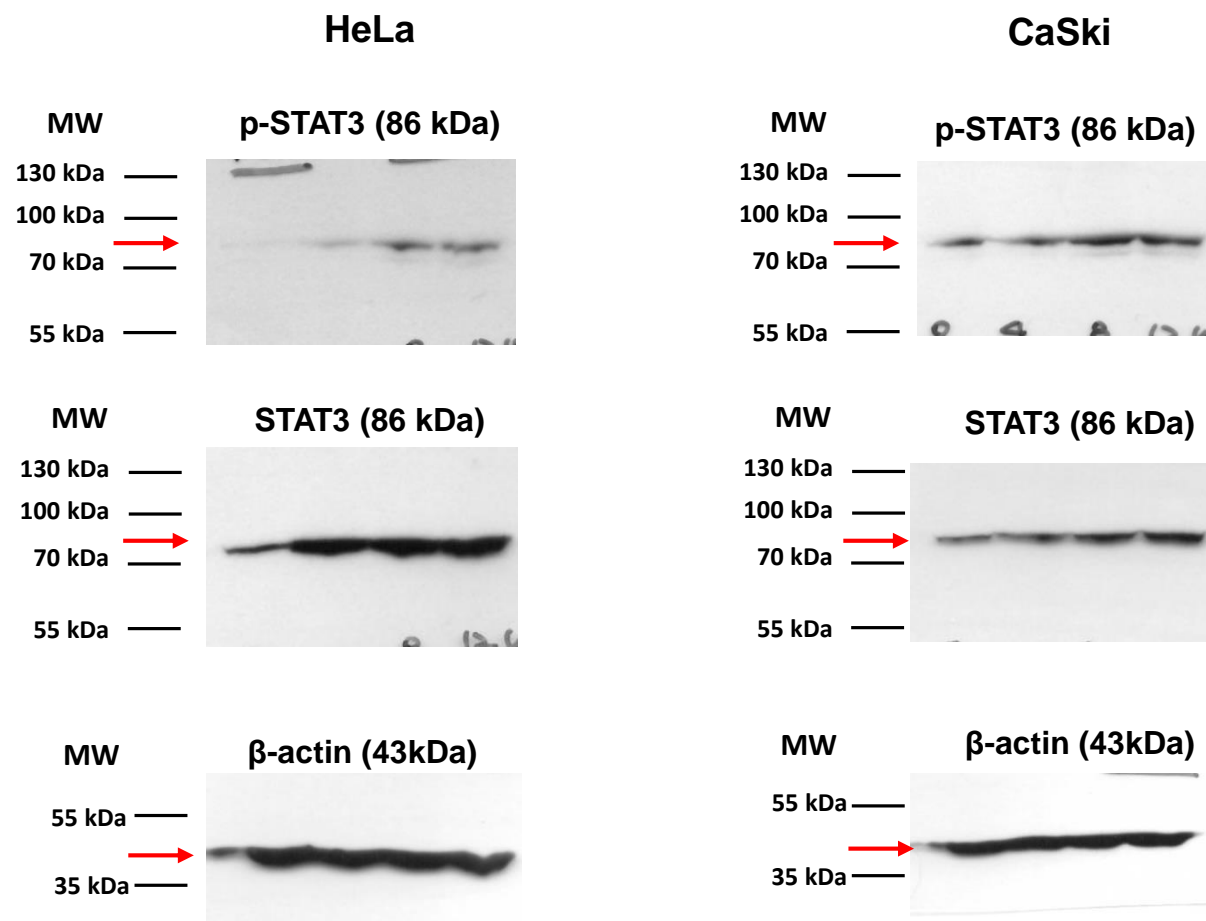

**Figure 3d**

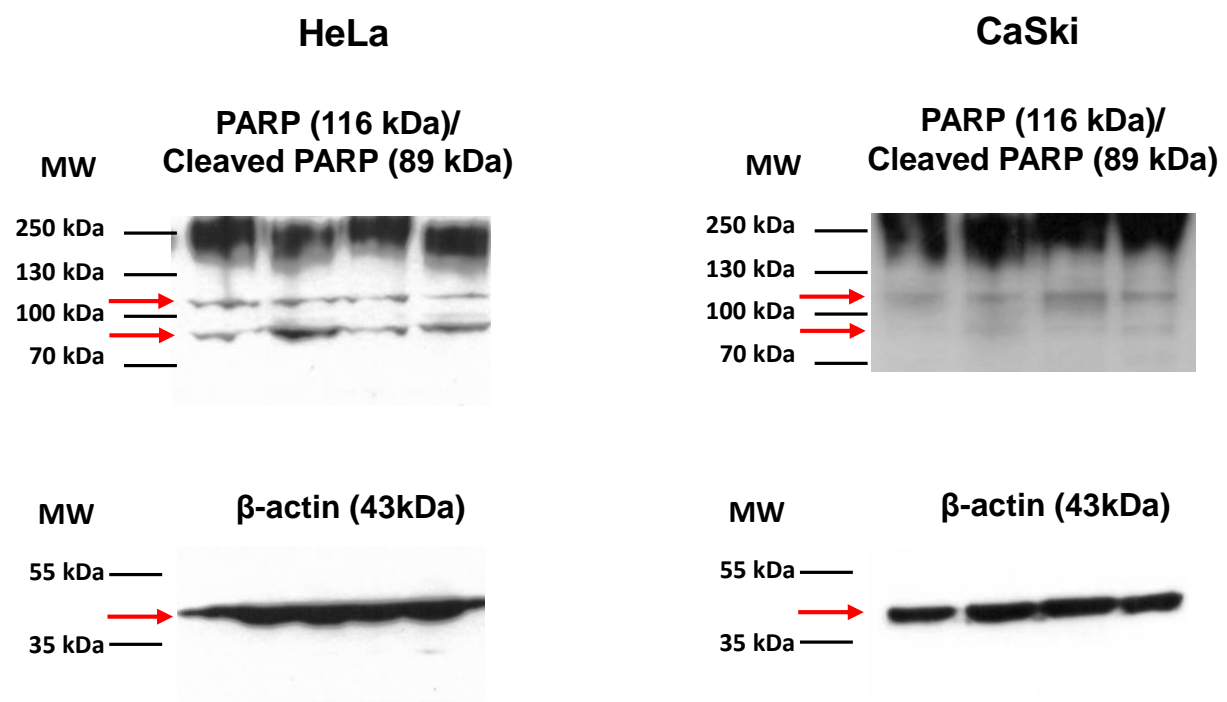



Figure 4b

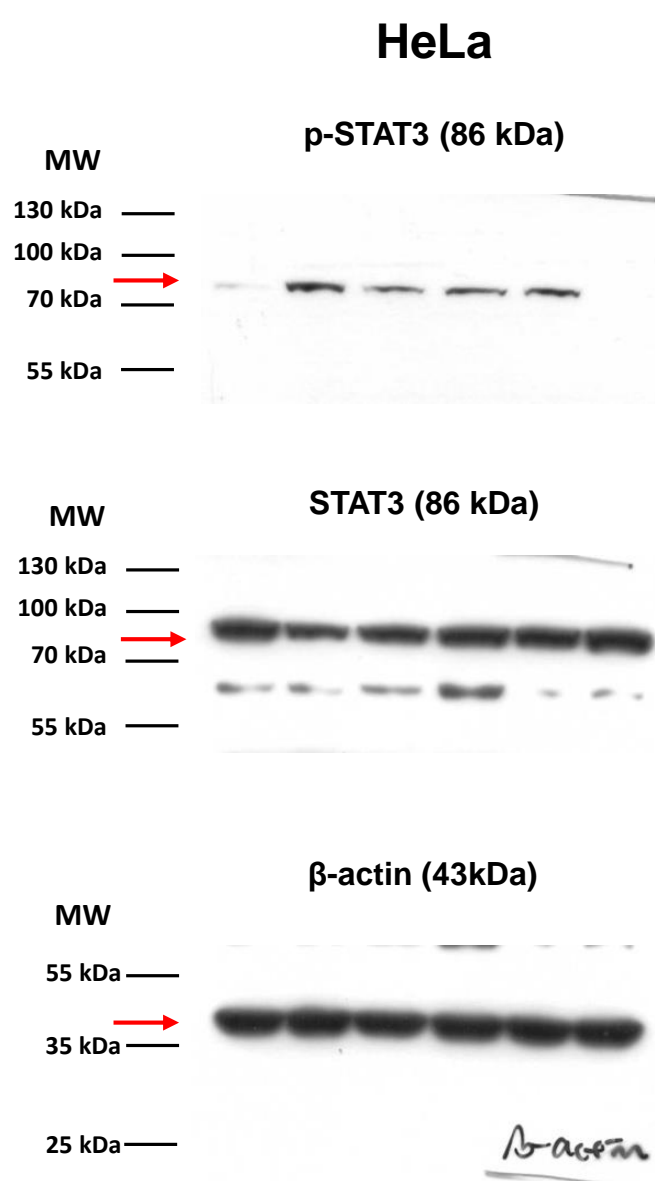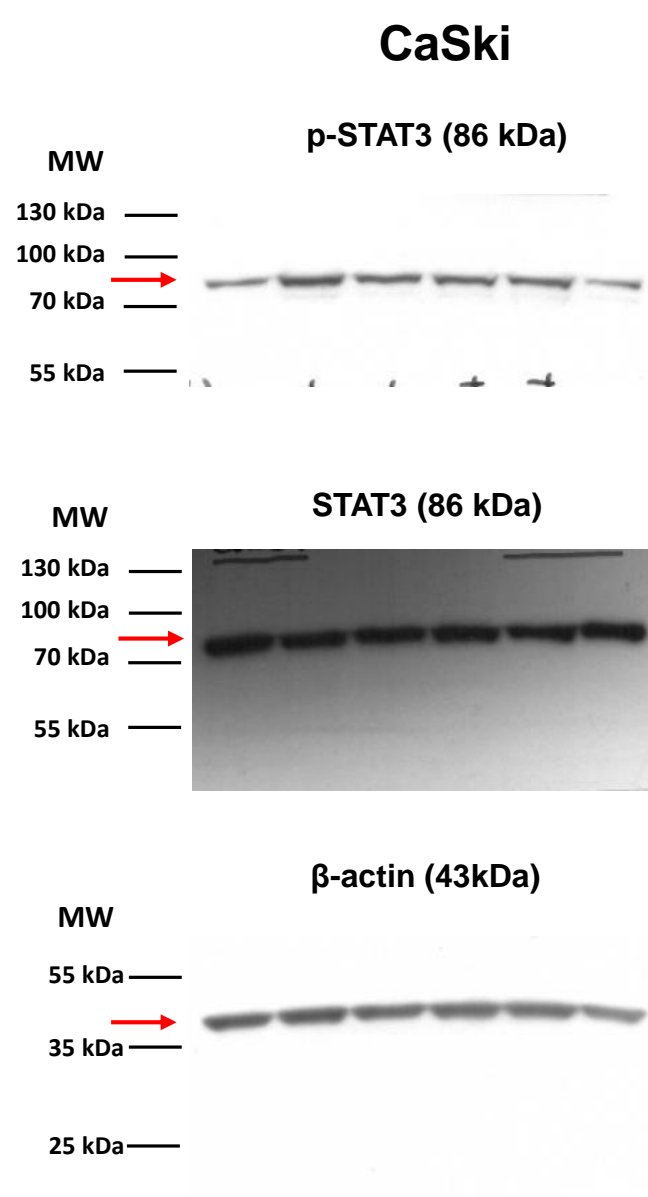

| Gel name : IL-6-p-STAT3-HeLa (Raw 1-D Image) |            |          |           |           |               |                      |              |  |
|----------------------------------------------|------------|----------|-----------|-----------|---------------|----------------------|--------------|--|
| Index                                        | Name       | Volume   | Adj. Vol. | % Adj. Vo | Concentration |                      |              |  |
|                                              |            | INT*mm2  | INT*mm2   |           |               |                      |              |  |
| IL-6                                         | TMS-TMF-4f |          |           |           |               | <b>p-STAT3/STAT3</b> | <b>Ratio</b> |  |
| 0                                            | 0          | 0        | 0         | 0         | N/A           | 0                    | 0            |  |
| 10                                           | 0          | 2073.498 | 2073.498  | 35.10905  | N/A           | 2.832960011          | 1            |  |
| 10                                           | 5          | 1060.581 | 1060.581  | 17.95807  | N/A           | 1.248993             | 0.44         |  |
| 10                                           | 5          | 1311.601 | 1311.601  | 22.20841  | N/A           | 1.2051586            | 0.43         |  |
| 10                                           | 10         | 1317.824 | 1317.824  | 22.31377  | N/A           | 1.17805566           | 0.42         |  |
| 10                                           | 10         | 142.3733 | 142.3733  | 2.410705  | N/A           | 0.124265744          | 0.04         |  |

| Gel name : IL-6-STAT3-HeLa (Raw 1-D Image) |            |          |           |           |               |  |  |  |
|--------------------------------------------|------------|----------|-----------|-----------|---------------|--|--|--|
| Index                                      | Name       | Volume   | Adj. Vol. | % Adj. Vo | Concentration |  |  |  |
|                                            |            | INT*mm2  | INT*mm2   |           |               |  |  |  |
| IL-6                                       | TMS-TMF-4f |          |           |           |               |  |  |  |
| 0                                          | 0          | 4209.595 | 4209.595  | 16.46033  | N/A           |  |  |  |
| 10                                         | 0          | 3169.423 | 3169.423  | 12.39306  | N/A           |  |  |  |
| 10                                         | 5          | 3677.064 | 3677.064  | 14.37804  | N/A           |  |  |  |
| 10                                         | 5          | 4712.755 | 4712.755  | 18.42779  | N/A           |  |  |  |
| 10                                         | 10         | 4844.052 | 4844.052  | 18.94119  | N/A           |  |  |  |
| 10                                         | 10         | 4961.286 | 4961.286  | 19.39959  | N/A           |  |  |  |

| Gel name : IL-6-p-STAT3-Caski (Raw 1-D Image) |            |          |           |           |               |                      |              |  |
|-----------------------------------------------|------------|----------|-----------|-----------|---------------|----------------------|--------------|--|
| Index                                         | Name       | Volume   | Adj. Vol. | % Adj. Vo | Concentration |                      |              |  |
|                                               |            | INT*mm2  | INT*mm2   |           |               |                      |              |  |
| IL-6                                          | TMS-TMF-4f |          |           |           |               | <b>p-STAT3/STAT3</b> | <b>Ratio</b> |  |
| 0                                             | 0          | 645.5334 | 645.5334  | 11.69218  | N/A           | 0.653933107          | 0.38         |  |
| 10                                            | 0          | 1706.862 | 1706.862  | 30.9154   | N/A           | 1.719610748          | 1            |  |
| 10                                            | 5          | 965.0021 | 965.0021  | 17.47853  | N/A           | 0.979538897          | 0.57         |  |
| 10                                            | 5          | 862.578  | 862.578   | 15.62338  | N/A           | 0.91290642           | 0.53         |  |
| 10                                            | 10         | 868.3028 | 868.3028  | 13.62707  | N/A           | 0.90155955           | 0.52         |  |
| 10                                            | 10         | 472.7938 | 472.7938  | 8.563443  | N/A           | 0.608649907          | 0.35         |  |

| Gel name : IL-6-STAT3-Caski (Raw 1-D Image) |            |          |           |           |               |  |  |  |
|---------------------------------------------|------------|----------|-----------|-----------|---------------|--|--|--|
| Index                                       | Name       | Volume   | Adj. Vol. | % Adj. Vo | Concentration |  |  |  |
|                                             |            | INT*mm2  | INT*mm2   |           |               |  |  |  |
| IL-6                                        | TMS-TMF-4f |          |           |           |               |  |  |  |
| 0                                           | 0          | 4863.591 | 4863.591  | 17.87977  | N/A           |  |  |  |
| 10                                          | 0          | 4890.348 | 4890.348  | 17.97814  | N/A           |  |  |  |
| 10                                          | 5          | 4853.759 | 4853.759  | 17.84363  | N/A           |  |  |  |
| 10                                          | 5          | 4655.258 | 4655.258  | 17.11389  | N/A           |  |  |  |
| 10                                          | 10         | 4111.526 | 4111.526  | 15.115    | N/A           |  |  |  |
| 10                                          | 10         | 3827.153 | 3827.153  | 14.06957  | N/A           |  |  |  |

**Figure 7b**

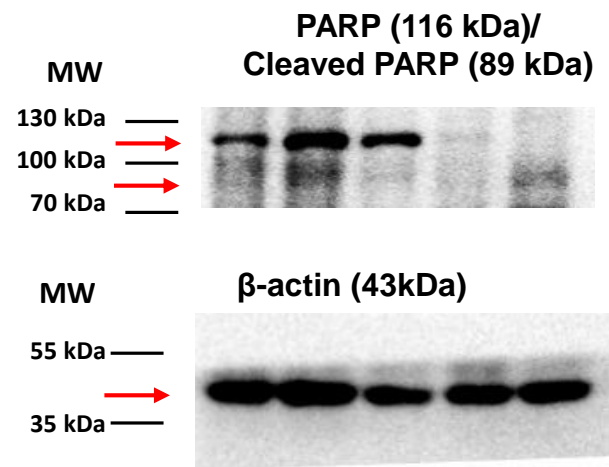

| Gel name : Xeno-PARP (Raw 1-D Image) |                  |          |           |           |               |                    |     |
|--------------------------------------|------------------|----------|-----------|-----------|---------------|--------------------|-----|
| Index                                | Name             | Volume   | Adj. Vol. | % Adj. Vo | Concentration |                    |     |
|                                      |                  | INT*mm2  | INT*mm2   |           |               |                    |     |
|                                      |                  |          |           |           |               | cleaved PARP/actin |     |
|                                      |                  |          |           |           |               | Ratio              |     |
| 1                                    | con              | 7088.921 | 7088.921  | 15.98974  | N/A           | 0.74               | 0.5 |
| 2                                    | PTX              | 9994.133 | 9994.133  | 32.4115   | N/A           | 1.39               | 1.0 |
| 3                                    | TMS-TMF-4f-5mpk  | 3790.316 | 3790.316  | 12.29219  | N/A           | 0.77               | 0.6 |
| 4                                    | TMS-TMF-4f-10mpk | 3334.198 | 3334.198  | 15.81298  | N/A           | 0.81               | 0.6 |
| 5                                    | TMS-TMF-4f-20mpk | 6627.577 | 6627.577  | 21.49358  | N/A           | 1.09               | 0.8 |

  

| Gel name : Xeno- b-actin (Raw 1-D Image) |                  |          |           |           |               |  |  |
|------------------------------------------|------------------|----------|-----------|-----------|---------------|--|--|
| Index                                    | Name             | Volume   | Adj. Vol. | % Adj. Vo | Concentration |  |  |
|                                          |                  | INT*mm2  | INT*mm2   |           |               |  |  |
| 1                                        | con              | 12050.08 | 12050.08  | 21.62821  | N/A           |  |  |
| 2                                        | PTX              | 14276.41 | 14276.41  | 23.25464  | N/A           |  |  |
| 3                                        | TMS-TMF-4f-5mpk  | 11012.03 | 11012.03  | 15.93734  | N/A           |  |  |
| 4                                        | TMS-TMF-4f-10mpk | 11931.48 | 11931.48  | 19.43502  | N/A           |  |  |
| 5                                        | TMS-TMF-4f-20mpk | 12121.64 | 12121.64  | 19.74478  | N/A           |  |  |

**Figure 7c**

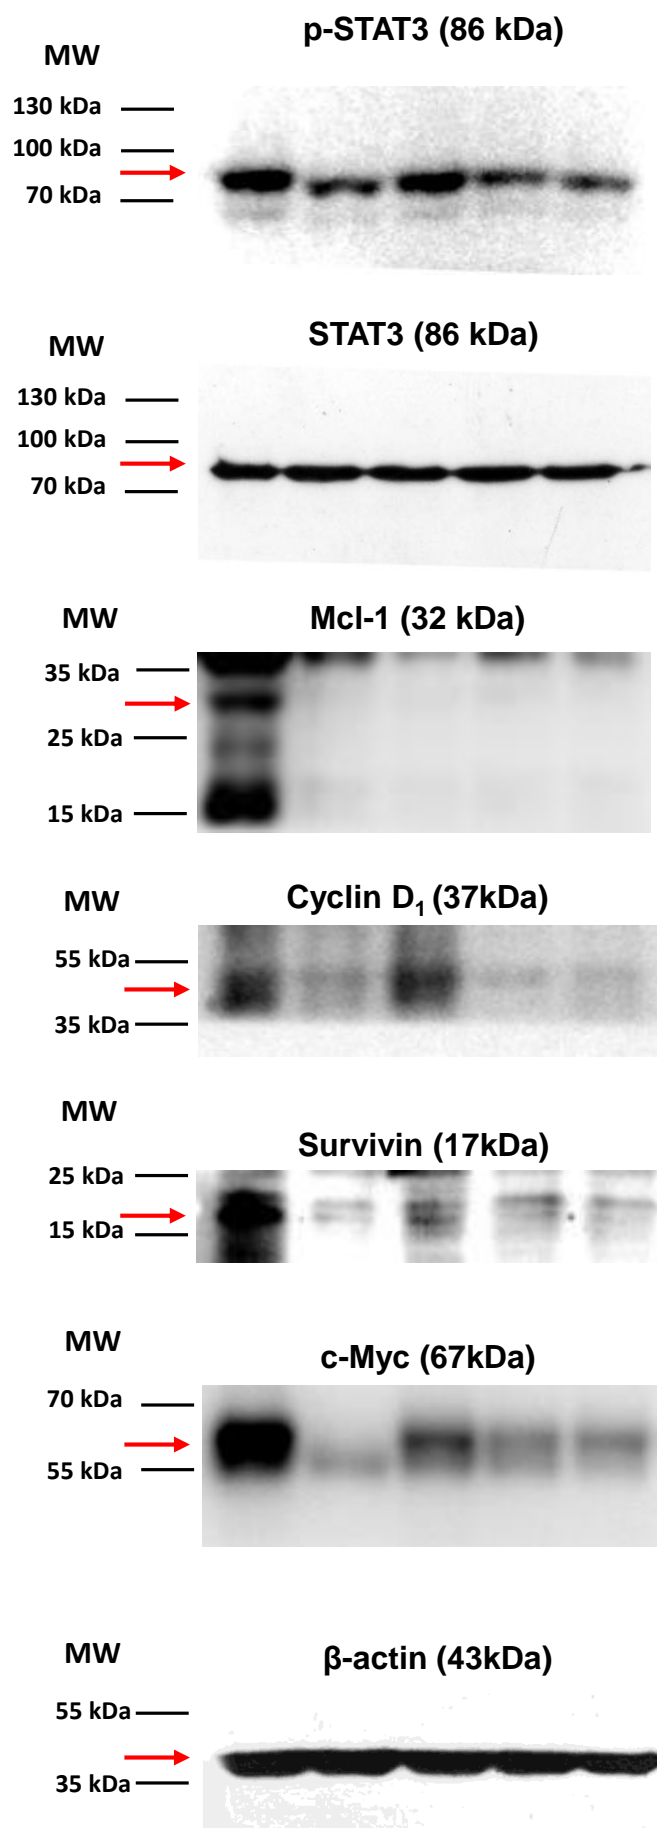

| Gel name : Xeno- p-STAT3 (Raw 1-D Image) |                  |          |           |           |               |               |     |
|------------------------------------------|------------------|----------|-----------|-----------|---------------|---------------|-----|
| Index                                    | Name             | Volume   | Adj. Vol. | % Adj. Vo | Concentration |               |     |
|                                          |                  | INT*mm2  | INT*mm2   |           |               |               |     |
|                                          |                  |          |           |           |               | p-STAT3/STAT3 |     |
|                                          |                  |          |           |           |               | Ratio         |     |
| 1                                        | con              | 10972.33 | 10972.33  | 25.18791  | N/A           | 1.30          | 1.0 |
| 2                                        | PTX              | 7955.232 | 7955.232  | 18.26192  | N/A           | 0.88          | 0.7 |
| 3                                        | TMS-TMF-4f-5mpk  | 10554.29 | 10554.29  | 24.22828  | N/A           | 1.22          | 0.9 |
| 4                                        | TMS-TMF-4f-10mpk | 7745.53  | 7745.53   | 17.78053  | N/A           | 0.85          | 0.7 |
| 5                                        | TMS-TMF-4f-20mpk | 6334.491 | 6334.491  | 14.54137  | N/A           | 0.75          | 0.6 |

  

| Gel name : Xeno-STAT3 (Raw 1-D Image) |                  |          |           |           |               |  |  |
|---------------------------------------|------------------|----------|-----------|-----------|---------------|--|--|
| Index                                 | Name             | Volume   | Adj. Vol. | % Adj. Vo | Concentration |  |  |
|                                       |                  | INT*mm2  | INT*mm2   |           |               |  |  |
| 1                                     | con              | 5913.843 | 5913.843  | 19.39369  | N/A           |  |  |
| 2                                     | PTX              | 6303.129 | 6303.129  | 20.6703   | N/A           |  |  |
| 3                                     | TMS-TMF-4f-5mpk  | 6031.823 | 6031.823  | 19.78059  | N/A           |  |  |
| 4                                     | TMS-TMF-4f-10mpk | 6345.692 | 6345.692  | 20.80988  | N/A           |  |  |
| 5                                     | TMS-TMF-4f-20mpk | 5899.157 | 5899.157  | 19.34553  | N/A           |  |  |

  

| Gel name : Xeno- Mcl-1 (Raw 1-D Image) |                  |          |           |           |               |             |     |
|----------------------------------------|------------------|----------|-----------|-----------|---------------|-------------|-----|
| Index                                  | Name             | Volume   | Adj. Vol. | % Adj. Vo | Concentration |             |     |
|                                        |                  | INT*mm2  | INT*mm2   |           |               |             |     |
|                                        |                  |          |           |           |               | Mcl-1/actin |     |
|                                        |                  |          |           |           |               | Ratio       |     |
| 1                                      | con              | 3411.732 | 3411.732  | 6.451036  | 15.50139      | 0.76        | 1.0 |
| 2                                      | PTX              | 11526.01 | 11526.01  | 21.79384  | 4.588453      | 0.23        | 0.3 |
| 3                                      | TMS-TMF-4f-5mpk  | 12619.08 | 12619.08  | 23.86064  | 4.191002      | 0.21        | 0.3 |
| 4                                      | TMS-TMF-4f-10mpk | 12518.15 | 12518.15  | 24.6698   | 4.053539      | 0.20        | 0.3 |
| 5                                      | TMS-TMF-4f-20mpk | 12811.6  | 12811.6   | 26.22468  | 3.813202      | 0.20        | 0.3 |

  

| Gel name : Xeno-cyclin D1 (Raw 1-D Image) |                  |          |           |           |               |                 |      |
|-------------------------------------------|------------------|----------|-----------|-----------|---------------|-----------------|------|
| Index                                     | Name             | Volume   | Adj. Vol. | % Adj. Vo | Concentration |                 |      |
|                                           |                  | INT*mm2  | INT*mm2   |           |               |                 |      |
|                                           |                  |          |           |           |               | Cyclin D1/actin |      |
|                                           |                  |          |           |           |               | Ratio           |      |
| 1                                         | con              | 7940.547 | 7940.547  | 13.15289  | 7.602893      | 0.37            | 1.00 |
| 2                                         | PTX              | 13136.55 | 13136.55  | 21.75966  | 4.595661      | 0.23            | 0.60 |
| 3                                         | TMS-TMF-4f-5mpk  | 7579.013 | 7579.013  | 12.55404  | 7.965566      | 0.39            | 1.05 |
| 4                                         | TMS-TMF-4f-10mpk | 15921.79 | 15921.79  | 26.37318  | 3.79173       | 0.19            | 0.51 |
| 5                                         | TMS-TMF-4f-20mpk | 15793.23 | 15793.23  | 28.16024  | 3.551107      | 0.19            | 0.50 |

  

| Gel name : Xeno- survivin (Raw 1-D Image) |                  |          |           |           |               |                |     |
|-------------------------------------------|------------------|----------|-----------|-----------|---------------|----------------|-----|
| Index                                     | Name             | Volume   | Adj. Vol. | % Adj. Vo | Concentration |                |     |
|                                           |                  | INT*mm2  | INT*mm2   |           |               |                |     |
|                                           |                  |          |           |           |               | survivin/actin |     |
|                                           |                  |          |           |           |               | Ratio          |     |
| 1                                         | con              | 3725.227 | 3725.227  | 6.659044  | 15.01717      | 0.74           | 1.0 |
| 2                                         | PTX              | 15022.37 | 15022.37  | 24.8533   | 4.023611      | 0.20           | 0.3 |
| 3                                         | TMS-TMF-4f-5mpk  | 10716.08 | 10716.08  | 18.15557  | 5.507952      | 0.27           | 0.4 |
| 4                                         | TMS-TMF-4f-10mpk | 12526.61 | 12526.61  | 22.39199  | 4.465883      | 0.22           | 0.3 |
| 5                                         | TMS-TMF-4f-20mpk | 13952.09 | 13952.09  | 24.9401   | 4.009607      | 0.21           | 0.3 |

  

| Gel name : Xeno- c-Myc (Raw 1-D Image) |                  |          |           |           |               |             |     |
|----------------------------------------|------------------|----------|-----------|-----------|---------------|-------------|-----|
| Index                                  | Name             | Volume   | Adj. Vol. | % Adj. Vo | Concentration |             |     |
|                                        |                  | INT*mm2  | INT*mm2   |           |               |             |     |
|                                        |                  |          |           |           |               | c-Myc/actin |     |
|                                        |                  |          |           |           |               | Ratio       |     |
| 1                                      | con              | 24876.12 | 24876.12  | 34.03567  | N/A           | 1.67        | 1.0 |
| 2                                      | PTX              | 9439.074 | 9439.074  | 12.9146   | N/A           | 0.63        | 0.4 |
| 3                                      | TMS-TMF-4f-5mpk  | 16415.61 | 16415.61  | 22.45995  | N/A           | 1.10        | 0.7 |
| 4                                      | TMS-TMF-4f-10mpk | 11962.22 | 11962.22  | 16.36678  | N/A           | 0.82        | 0.5 |
| 5                                      | TMS-TMF-4f-20mpk | 10395.36 | 10395.36  | 14.223    | N/A           | 0.75        | 0.5 |

  

| Gel name : Xeno-b-actin (Raw 1-D Image) |                  |          |           |           |               |  |  |
|-----------------------------------------|------------------|----------|-----------|-----------|---------------|--|--|
| Index                                   | Name             | Volume   | Adj. Vol. | % Adj. Vo | Concentration |  |  |
|                                         |                  | INT*mm2  | INT*mm2   |           |               |  |  |
| 1                                       | con              | 7347.158 | 7347.158  | 20.34314  | N/A           |  |  |
| 2                                       | PTX              | 7353.132 | 7353.132  | 20.35968  | N/A           |  |  |
| 3                                       | TMS-TMF-4f-5mpk  | 7361.097 | 7361.097  | 20.38174  | N/A           |  |  |
| 4                                       | TMS-TMF-4f-10mpk | 7245.108 | 7245.108  | 20.06058  | N/A           |  |  |
| 5                                       | TMS-TMF-4f-20mpk | 6809.649 | 6809.649  | 18.85486  | N/A           |  |  |
